# Supplementary material for: Primary 1,25-Dihydroxyvitamin D3 Response of the Interleukin 8 Gene Cluster in Human Monocyte- and Macrophage-Like Cells
Source: PubMed Central journal article supplement (PMC3824026; doi:10.1371/journal.pone.0078170), 2013-10-21
Supplement: pone.0078170.s004.pdf [file pone.0078170.s004.pdf]

**Table S2: ChIP-qPCR primers.**

| <b>Genomic region</b>       | <b>Fragment size (bp)</b> | <b>Annealing temperature (°C)</b> | <b>Primer sequences (5'-3')</b> |
|-----------------------------|---------------------------|-----------------------------------|---------------------------------|
| <b><i>CXCL8</i></b>         | 93                        | 58                                | GAATGTAGGTTGGGTGGAAC            |
| VDR site                    |                           |                                   | CAGGTGACTTGGACTCTATG            |
| <b>CXCL cluster</b>         | 130                       | 63                                | GGCACGGAATAACTGTCAAC            |
| CTCF site 1                 |                           |                                   | TCACTAGGTCAGGTGGCAG             |
| <b>CXCL cluster</b>         | 100                       | 63                                | GAGAGGAACAGGGGGAGTAG            |
| CTCF site 2                 |                           |                                   | CTGCCACTTATAGGTAGGATG           |
| <b>CXCL cluster</b>         | 163                       | 63                                | CAACACAGAGGACTCAAGAAC           |
| CTCF site 3                 |                           |                                   | CGCAGGAGAAACCAGAGGCA            |
| <b>CXCL cluster</b>         | 174                       | 63                                | CTCTCTTCTTTTAGCCAAGTG           |
| CTCF site 4                 |                           |                                   | TTCTAAGTCTGTCACAAGGTG           |
| <b>CXCL cluster</b>         | 210                       | 63                                | GAGGGAGAAATGTCTGTGAAG           |
| CTCF site 5                 |                           |                                   | CATAAGGAGGAGGACCAAAG            |
| <b>CXCL cluster</b>         | 137                       | 63                                | TGATGGCAGCATTGAGCAAG            |
| CTCF site 6                 |                           |                                   | GACACCAACCAATCCCCTG             |
| <b>Chr 6 control region</b> | 180                       | 60                                | ATCACAGGGGTCAGCACATC            |
| negative control            |                           |                                   | CGCAGCATTTGGGTTTCACAC           |
